# Supplementary material for: Changes in Hemoglobin Properties in Complex with Glutathione and after Glutathionylation
Source: MDPI journal article supplement (doi:10.3390/ijms241713557), 2023-08-31
Supplement: s1 [file s1]

## Supplementary

### Changes of the Hemoglobin Properties in Complex with Glutathione and After Glutathionylation

*Iu.D. Kuleshova, P.I. Zaripov, Yu.M. Poluektov, A.A Anashkina, D.N. Kaluzhny, E.Yu. Parshina,*

*G.V. Maksimov, V.A. Mitkevic, A.A. Makarov and I.Yu. Petrushanko*

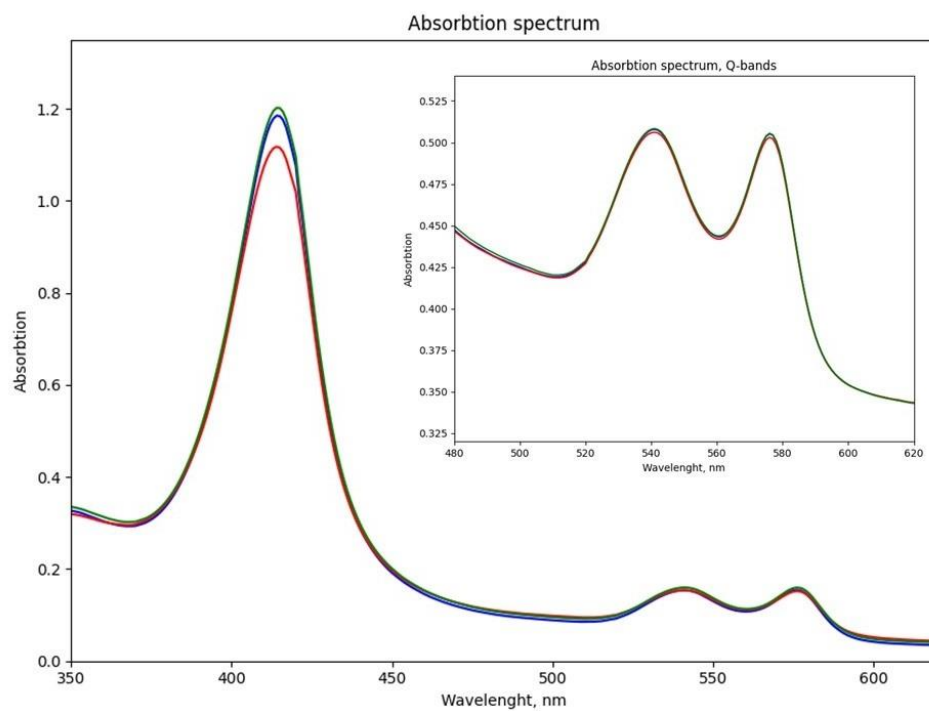

Figure S1. Absorption spectrum of hemoglobin (blue), glutathionylated hemoglobin (green) and non-covalent complex of hemoglobin with GSH (red).

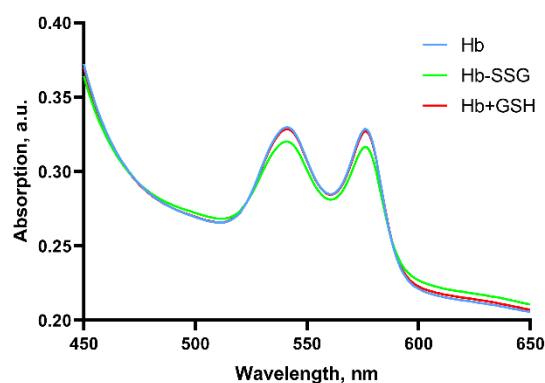

(a)

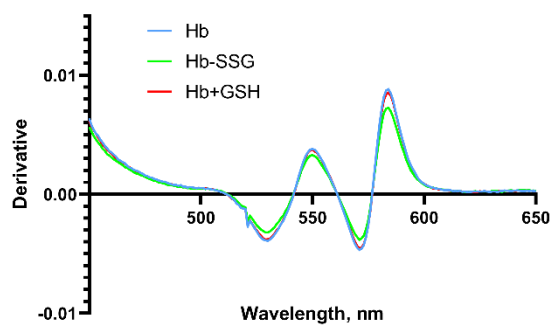

(b)

Figure S2. Efficiency of metHb reduction with sodium dithionite. (a) – absorption spectra of the samples; (b) – first derivative spectra of the samples. hemoglobin Blue – hemoglobin (Hb), green – glutathionylated hemoglobin (Hb-SSG), red – non-covalent complex of hemoglobin with GSH (Hb+GSH).

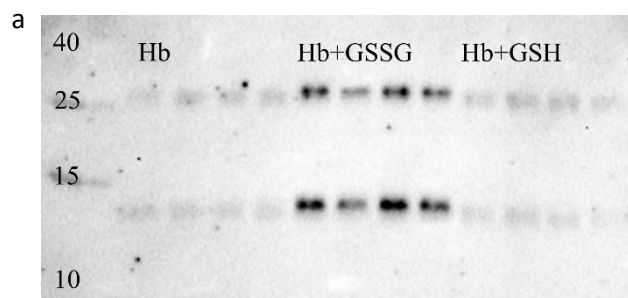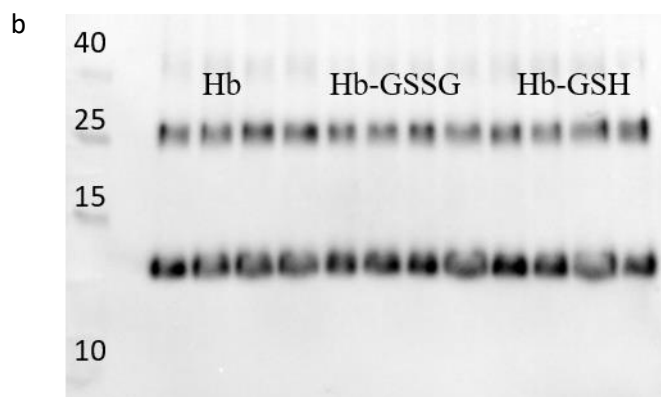

Figure S3. (a) – The original immunoblotting readouts, mouse monoclonal anti-glutathione antibody (a) and rabbit monoclonal anti- $\alpha$  Hb subunit antibody (b) were applied to detect glutathionylated proteins and total amount of  $\alpha$ -subunit correspondingly. The upper bands correspond to hemoglobin dimers. Bottom bands - hemoglobin monomer. The bands corresponding to the monomers are used in the article for analysis (Fig. 1).
